# Supplementary material
Source: MDPI journal article supplement (https://www.mdpi.com/2673-866X/2/4/43)
Supplement: s1 [file s1 › File S1 Samatar.pdf]

### **Full Search Strategy**

Databases selected: PubMed, Embase and MEDLINE

Dates: database inception to 6<sup>th</sup> June 2022

Search terms: Honey, burn

- 1) Honey
- 2) Burn
- 3) 1 AND 2

Total results → 426

After removal of duplicates → 319
