# Supplementary material
Source: MDPI journal article supplement (https://www.mdpi.com/2673-866X/2/4/43)
Supplement: s1 [file s1 › File S2 Samatar.xlsx]

## Sheet: Studies
Subrahmanyam 1993	Honey impregnated gauze versus polyurethane film (OpSite) in the treatment of burns - a prospective randomised study
Subrahmanyam 1994	Honey-impregnated gauze versus amniotic membrane in the treatment of burns
Subrahmanyam 1996	Honey dressing versus boiled potato peel in the treatment of burns: A prospective randomized study
Katarzyna et al. 2017	Manuka honey dressing compared with 2% silver sulfathiazole cream on the treatment of superficial burns
Nagane et al. 2004	Efficacy of topical honey therapy against silver sulphadiazine treatment in burns: A biochemical study
Shah et al. 2013	Effectiveness of Honey Dressing and Silver Sulfadiazine Dressing on Wounds Healing in Burn Patients
Abbasi et al. 2020	Efficacy of a Natural Topical Skin Ointment for Managing Split-Thickness Skin Graft Donor Sites: A Pilot Double-blind Randomized Controlled Trial
Karpelowsky et al. 2007	Wound healing with honey - A randomised controlled trial
Wang et al. 2014	In-vitro Activity of Honey and Topical Silver in Wound Care Management
Memon et al. 2005	Therapeutic effects of honey versus silver sulfadiazine in the management of burn injuries
